# Supplementary material
Source: PubMed Central journal article supplement (PMC3754183)
Supplement: AEM.01505-13_zam999104683so1.pdf [file AEM.01505-13_zam999104683so1.pdf]

1 Figure A1

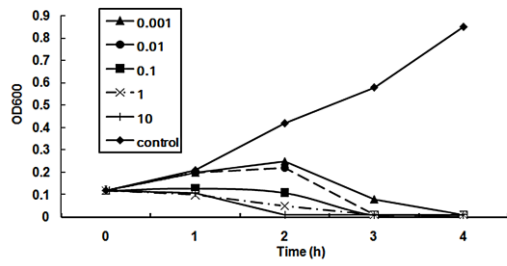

2 Figure A1 Time course of bacteriolytic activity of phage Bp7 against *E.coli* O78 strains.

3 Early-exponential cultures of *E.coli* ( $5 \times 10^7$ CFU/mL) were infected with Bp7 at MOI of 0.001,

4 0.01, 0.1, 1 and 10.

5

6 Figure A2

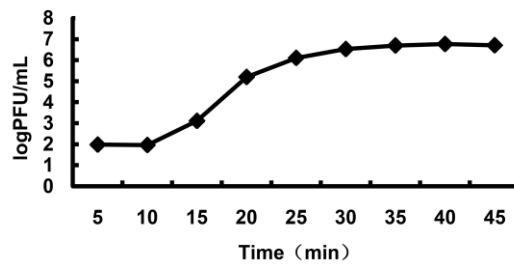

7 Figure A2 One-step growth of phage Bp7. The latent period was estimated to be 10-15 min, and

8 the average burst size was about 90 PFU/infected cell.

9 Table A1 Genome annotation of phage Bp7

10

| ORF   | Gene | Start | Stop | Size(bp) | hypothetical protein           | Molecular mass (kDa) | No. of peptides | Identities (%) |      |       |      |                                 |
|-------|------|-------|------|----------|--------------------------------|----------------------|-----------------|----------------|------|-------|------|---------------------------------|
|       |      |       |      |          |                                |                      |                 | T4             | JS98 | IME08 | JS10 | Other phages (Identities%)      |
| ORF1  | Hp1  | 189   | 587  | 399      | conserved hypothetical protein | 15.13                | 133             |                |      | 97    |      |                                 |
| ORF2  | e.6  | 665   | 1258 | 594      | hypothetical protein           | 22.45                | 198             |                |      | 97.7  |      |                                 |
| ORF3  | Hp3  | 1307  | 1843 | 537      | hypothetical protein           | 20.86                | 179             |                | 90.4 | 97.7  | 91.5 |                                 |
| ORF4  | Hp4  | 1836  | 2186 | 351      | hypothetical protein           | 13.02                | 117             |                | 70.1 | 69.2  | 70.1 |                                 |
| ORF5  | Hp5  | 2183  | 2473 | 291      | hypothetical protein           | 10.68                | 97              |                | 99   | 100   | 100  |                                 |
| ORF6  | Hp6  | 2483  | 2764 | 282      | hypothetical protein           | 10.45                | 94              |                | 94.6 |       |      |                                 |
| ORF7  | Hp7  | 2774  | 2986 | 213      | hypothetical protein           | 8.11                 | 71              |                |      |       |      | Shigella phage SP18 gp138 (58%) |
| ORF8  | Hp8  | 2997  | 3221 | 225      | hypothetical protein           | 8.26                 | 75              |                | 97.3 | 97.3  | 98.6 |                                 |
| ORF9  | Hp9  | 3215  | 3442 | 228      | hypothetical protein           | 9.03                 | 76              |                | 100  | 100   | 100  |                                 |
| ORF10 | Hp10 | 3452  | 3802 | 351      | hypothetical protein           | 13.95                | 117             |                | 99.1 | 100   | 99.1 |                                 |
| ORF11 | Hp11 | 3846  | 4085 | 240      | hypothetical protein           | 9.43                 | 80              |                | 100  | 98.7  | 96.3 |                                 |
| ORF12 | Hp12 | 4105  | 5064 | 960      | hypothetical protein           | 37.41                | 320             |                | 98.4 | 98.1  | 96.9 |                                 |
| ORF13 | Hp13 | 5077  | 5355 | 279      | hypothetical protein           | 10.36                | 93              |                | 100  | 98.9  |      |                                 |
| ORF14 | Hp14 | 5370  | 6059 | 690      | hypothetical protein           | 26.62                | 230             |                | 91.7 | 93.4  | 92.1 |                                 |
| ORF15 | e.2  | 6059  | 6646 | 588      | hypothetical protein           | 22.35                | 196             | 65.4           |      | 96.9  |      |                                 |
| ORF16 | Hp16 | 6643  | 6879 | 237      | hypothetical protein           | 9.11                 | 79              |                | 94.9 | 94.9  | 94.9 |                                 |
| ORF17 | NudE | 6872  | 7321 | 450      | nudix hydrolase                | 17.24                | 150             | 74.8           | 98.7 | 99.3  | 99.3 |                                 |
| ORF18 | e    | 7352  | 7840 | 489      | lysozyme murein                | 18.71                | 163             |                | 100  | 99.4  |      |                                 |

|       |        |       |       |     |                             |       |     |      |      |      |                                           |
|-------|--------|-------|-------|-----|-----------------------------|-------|-----|------|------|------|-------------------------------------------|
| ORF19 | DenV   | 7902  | 8345  | 444 | hydrolase<br>endonuclease V | 17.22 | 148 | 98.6 | 99.3 | 100  |                                           |
| ORF20 | Vs.8   | 8448  | 9035  | 588 | hypothetical protein        | 21.74 | 196 | 74.7 | 96.4 | 96.7 | 64.2                                      |
| ORF21 | Vs.7   | 9032  | 9328  | 297 | hypothetical protein        | 11.86 | 99  | 62   | 99   | 98   | 98                                        |
| ORF22 | Hp17   | 9321  | 9539  | 219 | hypothetical protein        | 8.32  | 73  |      | 84.7 | 84.7 | 83.3                                      |
| ORF23 | Vs.4   | 9536  | 9814  | 279 | hypothetical protein        | 10.82 | 93  | 78.4 | 85.9 | 87   |                                           |
| ORF24 | RegB   | 9876  | 10334 | 459 | site-specific RNA           | 17.99 | 153 | 73.5 | 100  | 100  |                                           |
|       |        |       |       |     | endonuclease                |       |     |      |      |      |                                           |
| ORF25 | Vs.1   | 10347 | 10886 | 540 | hypothetical protein        | 20.65 | 180 | 82.7 | 100  | 100  | 100                                       |
| ORF26 | Vs     | 10887 | 11243 | 357 | valyl-tRNA synthetase       | 13.46 | 119 | 61.7 | 100  | 100  |                                           |
|       |        |       |       |     | modifier                    |       |     |      |      |      |                                           |
| ORF27 | Tk.4   | 11240 | 11707 | 468 | hypothetical protein        | 16.97 | 156 | 72.9 | 85.5 | 98.7 | 98.1                                      |
| ORF28 | Tk.3   | 11679 | 11891 | 213 | hypothetical protein        | 8.76  | 71  | 75.7 | 98.6 | 98.6 |                                           |
| ORF29 | Tk.2   | 11882 | 12073 | 192 | hypothetical protein        | 7.38  | 64  | 68.9 | 88.5 | 98.4 |                                           |
| ORF30 | Tk     | 12083 | 12655 | 573 | hypothetical protein        | 21.13 | 191 | 82.7 | 99.5 | 99.5 | 100                                       |
| ORF31 | Hp18   | 12663 | 12941 | 279 | hypothetical protein        | 10.68 | 93  |      | 98.9 | 100  |                                           |
| ORF32 | Hp19   | 13034 | 13327 | 294 | hypothetical protein        | 10.63 | 98  |      | 91.8 | 94.8 |                                           |
| ORF33 | MobD.6 | 13314 | 13685 | 372 | hypothetical protein        | 14.16 | 124 | 71.7 | 97.9 | 99   |                                           |
| ORF34 | Hp20   | 13797 | 14033 | 237 | hypothetical protein        | 9.26  | 79  |      |      |      | Enterobacteria phage<br>vB_EcoM-VR7( 84%) |
| ORF35 | MobD.3 | 14038 | 14220 | 183 | hypothetical protein        | 6.75  | 61  | 74.6 | 88.3 | 83.3 | 88.3                                      |
| ORF36 | Hp21   | 14320 | 14538 | 219 | hypothetical protein        | 8.15  | 73  |      | 100  | 100  | 100                                       |
| ORF37 | MobD.1 | 14549 | 15109 | 561 | hypothetical protein        | 21.42 | 187 | 57.5 | 93.5 | 91.4 | 94.6                                      |
| ORF38 | Hp22   | 15120 | 15572 | 453 | hypothetical protein        | 17.16 | 151 |      | 98.7 | 98.7 |                                           |

|              |             |              |              |            |                                                         |             |           |      |      |      |      |                                                    |
|--------------|-------------|--------------|--------------|------------|---------------------------------------------------------|-------------|-----------|------|------|------|------|----------------------------------------------------|
| ORF39        | NrdC.11     | 15569        | 16579        | 1011       | hypothetical protein                                    | 39.00       | 337       | 89.9 | 94   | 94   | 93.8 |                                                    |
| ORF40        | NrdC.10     | 16610        | 17668        | 1059       | hypothetical protein                                    | 39.73       | 353       | 85.4 | 98.5 | 98.6 | 98.8 |                                                    |
| ORF41        | Hp23        | 17746        | 18030        | 285        | hypothetical protein                                    | 11.06       | 95        | 58.5 | 84   | 89.4 | 80.9 |                                                    |
| ORF42        | NrdC.8      | 18031        | 18582        | 552        | hypothetical protein                                    | 21.06       | 184       | 84.5 | 100  | 99.3 | 99.3 |                                                    |
| ORF43        | NrdC.6      | 18679        | 19518        | 840        | hypothetical protein                                    | 32.28       | 280       | 64.2 | 87.9 | 99.3 | 89.3 |                                                    |
| ORF44        | Hp24        | 19520        | 19708        | 189        | hypothetical protein                                    | 6.92        | 63        |      |      |      |      | Enterobacteria phage<br>vB_EcoM-VR7 gp094<br>(61%) |
| ORF45        | Hp25        | 19738        | 20607        | 870        | hypothetical protein                                    | 33.13       | 290       | 49.5 | 95.5 | 95.8 | 93.2 |                                                    |
| ORF46        | NrdC.4      | 20627        | 21676        | 1050       | hypothetical protein                                    | 39.89       | 350       | 61.3 | 91.6 | 98.8 | 96.7 |                                                    |
| ORF47        | NrdC.2      | 21673        | 21984        | 312        | hypothetical protein                                    | 11.75       | 104       | 83.5 | 89.4 | 97.1 | 87.9 |                                                    |
| ORF48        | NrdC.1      | 21971        | 22207        | 237        | hypothetical protein                                    | 9.08        | 79        | 79.7 | 98.7 | 98.7 |      |                                                    |
| ORF49        | NrdC        | 22209        | 22472        | 264        | thioredoxin                                             | 9.89        | 88        | 94.3 |      |      |      |                                                    |
| ORF50        | Hp26        | 22469        | 22630        | 162        | hypothetical protein                                    | 6.15        | 54        |      |      |      |      | Shigella phage SP18<br>gp087 (81%)                 |
| ORF51        | gp49.3      | 22627        | 22935        | 309        | hypothetical protein                                    | 12.03       | 103       | 91.2 | 93.1 | 99   | 95.1 |                                                    |
| ORF52        | Hp27        | 23052        | 23225        | 174        | hypothetical protein                                    | 6.49        | 58        | 62.5 | 100  | 98.2 | 91.2 |                                                    |
| ORF53        | Hp28        | 23225        | 23527        | 303        | hypothetical protein                                    | 11.67       | 101       |      | 100  |      | 99   |                                                    |
| ORF54        | Hp29        | 23524        | 23709        | 186        | hypothetical protein                                    | 7.22        | 62        |      | 96.7 | 96.5 |      |                                                    |
| ORF55        | Hp30        | 23748        | 24563        | 816        | hypothetical protein                                    | 32.13       | 272       |      |      |      |      | Salmonella phage<br>STML-198 (82%)                 |
| <b>ORF56</b> | <b>Hp31</b> | <b>24578</b> | <b>24685</b> | <b>108</b> | <b>hypothetical protein</b>                             | <b>3.91</b> | <b>36</b> |      |      |      |      |                                                    |
| ORF57        | gp55.8      | 24835        | 24948        | 114        | conserved hypothetical<br>predicted membrane<br>protein | 4.43        | 38        |      |      |      |      | Enterobacteria phage<br>vB_EcoM-VR7 (60%)          |

|       |         |       |       |      |                                                         |       |     |      |      |      |      |
|-------|---------|-------|-------|------|---------------------------------------------------------|-------|-----|------|------|------|------|
| ORF58 | gp55.8' | 24945 | 25160 | 216  | conserved hypothetical<br>predicted membrane<br>protein | 7.85  | 72  |      |      | 94.4 |      |
| ORF59 | Hp32    | 25157 | 25453 | 297  | hypothetical protein                                    | 11.76 | 99  |      | 94.9 | 98   | 94.9 |
| ORF60 | NrdH    | 25434 | 25751 | 318  | glutaredoxin                                            | 9.80  | 89  | 76.7 | 98.9 | 100  |      |
| ORF61 | gp55.6  | 25811 | 25993 | 183  | hypothetical protein                                    | 6.99  | 61  | 71.2 | 79.3 | 100  |      |
| ORF62 | Hp33    | 25990 | 26244 | 255  | hypothetical protein                                    | 9.83  | 85  |      | 98.8 | 100  | 98.8 |
| ORF63 | gp55.5  | 26247 | 26510 | 264  | hypothetical protein                                    | 10.46 | 88  |      | 98.6 | 98.6 |      |
| ORF64 | gp55.4  | 26546 | 26677 | 132  | hypothetical protein                                    | 5.17  | 44  | 100  | 97.7 | 97.7 | 97.7 |
| ORF65 | gp55.3  | 26678 | 26878 | 201  | hypothetical protein                                    | 7.66  | 67  | 85.7 | 93.9 | 98.5 | 95.5 |
| ORF66 | gp55.2  | 26946 | 27275 | 330  | hypothetical protein                                    | 12.48 | 110 | 76.6 | 98.2 | 98.2 |      |
| ORF67 | gp55.1  | 27272 | 27538 | 267  | hypothetical protein                                    | 10.32 | 89  | 72.9 | 98.6 | 98.9 |      |
| ORF68 | Hp34    | 27535 | 27798 | 264  | hypothetical protein                                    | 10.10 | 88  |      | 96.6 | 78.2 |      |
| ORF69 | gp55    | 27865 | 28422 | 558  | sigma factor for T4 late<br>transcription               | 21.39 | 186 | 84.3 | 98.4 | 100  |      |
| ORF70 | a-gt.5  | 28406 | 28636 | 231  | hypothetical protein                                    | 8.96  | 77  | 63.4 | 65.3 |      |      |
| ORF71 | a-gt.4  | 28638 | 28949 | 312  | hypothetical protein                                    | 12.13 | 104 | 64.6 |      | 99   |      |
| ORF72 | a-gt.3  | 29038 | 29133 | 96   | hypothetical protein                                    | 7.88  | 67  | 63.1 | 98.5 | 98.5 |      |
| ORF73 | gp47    | 29431 | 30453 | 1023 | recombination<br>endonuclease subunit                   | 39.37 | 341 | 82   | 92.1 | 92.4 | 92.4 |
| ORF74 | gp46.2  | 30450 | 30713 | 264  | hypothetical protein                                    | 10.00 | 88  | 65.4 | 95.4 | 87.4 | 95.3 |
| ORF75 | gp46.1  | 30706 | 30912 | 207  | hypothetical protein                                    | 7.93  | 69  | 60.7 | 98.5 | 98.5 |      |
| ORF76 | gp46    | 30909 | 32147 | 1239 | recombination<br>endonuclease subunit                   | 46.44 | 413 | 79.6 | 98.5 | 99.8 | 98.8 |
| ORF77 | gp46'   | 32227 | 32409 | 183  | recombination                                           | 6.91  | 61  | 94.8 | 94.8 | 94.8 | 94.8 |

|       |        |       |       |      |                                                         |        |     |      |      |      |      |  |
|-------|--------|-------|-------|------|---------------------------------------------------------|--------|-----|------|------|------|------|--|
| ORF78 | mobB   | 32592 | 33308 | 717  | endonuclease subunit<br>putative homing<br>endonuclease | 27.45  | 239 | 64.7 |      |      |      |  |
| ORF79 | gp45.2 | 33352 | 33546 | 195  | hypothetical protein                                    | 7.65   | 65  | 83.3 | 95.2 | 100  | 96.8 |  |
| ORF80 | RpbA   | 33592 | 34020 | 429  | RNA polymerase<br>binding protein                       | 16.42  | 143 | 68.2 | 97.1 | 100  |      |  |
| ORF81 | gp45   | 34049 | 34747 | 699  | sliding clamp DNA<br>polymerase accessory<br>protein    | 25.50  | 233 | 72.8 |      |      |      |  |
| ORF82 | Hp35   | 34747 | 35325 | 579  | unknown                                                 | 22.53  | 193 | 42.1 |      |      |      |  |
| ORF83 | gp44   | 35303 | 36295 | 993  | clamp loader subunit<br>DNA polymerase                  | 36.96  | 331 | 81.1 |      |      | 99.4 |  |
| ORF84 | gp62   | 36286 | 36858 | 573  | clamp loader subunit<br>DNA polymerase                  | 22.17  | 191 | 72.7 |      |      | 98.9 |  |
| ORF85 | RegA   | 36864 | 37226 | 363  | translational repressor<br>protein                      | 14.38  | 121 | 88.5 |      |      | 99.2 |  |
| ORF86 | Hp36   | 37216 | 37443 | 228  | hypothetical protein                                    | 8.73   | 76  |      | 94.4 | 94.7 | 95.8 |  |
| ORF87 | gp43   | 37525 | 40236 | 2712 | DNA polymerase                                          | 104.71 | 904 | 77.8 | 98.8 | 99.1 | 98.9 |  |
| ORF88 | Imm    | 40299 | 40535 | 237  | immunity to<br>superinfection<br>membrane protein       | 8.69   | 79  |      |      |      | 98.7 |  |
| ORF89 | Hp37   | 40532 | 40669 | 138  | hypothetical protein                                    | 5.22   | 46  |      | 100  |      | 100  |  |
| ORF90 | Hp38   | 40677 | 41177 | 501  | hypothetical protein                                    | 19.11  | 167 |      | 98.2 | 99.4 | 98.8 |  |

|        |        |       |       |      |                                      |       |     |      |      |      |                                                          |
|--------|--------|-------|-------|------|--------------------------------------|-------|-----|------|------|------|----------------------------------------------------------|
| ORF91  | Hp39   | 41208 | 42911 | 1704 | hypothetical protein                 | 65.06 | 568 | 99.3 | 99.6 | 99.5 |                                                          |
| ORF92  | Hp40   | 42896 | 43270 | 375  | hypothetical protein                 | 14.60 | 125 | 91.7 | 91.7 |      |                                                          |
| ORF93  | Hp41   | 43267 | 43803 | 537  | hypothetical protein                 | 20.84 | 179 | 99.4 | 100  |      |                                                          |
| ORF94  | Hp42   | 43800 | 44498 | 699  | hypothetical protein                 | 26.68 | 233 | 99.1 | 99.1 |      |                                                          |
| ORF95  | Hp43   | 44495 | 45388 | 894  | hypothetical protein                 | 34.69 | 298 | 98.6 | 99.3 |      |                                                          |
| ORF96  | UvsX   | 45466 | 46647 | 1182 | RecA-like<br>recombination protein   | 43.57 | 394 | 82.1 | 99   | 99.7 | 99.5                                                     |
| ORF97  | gp40   | 46640 | 46969 | 330  | head vertex assembly<br>chaperone    | 12.71 | 110 | 71.8 | 100  | 100  |                                                          |
| ORF98  | gp41   | 46963 | 48393 | 1431 | DNA primase-helicase<br>subunit      | 53.59 | 477 | 80.4 | 100  | 99.8 |                                                          |
| ORF99  | Hp44   | 48476 | 48793 | 318  | hypothetical protein                 | 11.64 | 106 |      | 100  | 100  |                                                          |
| ORF100 | Dmd    | 48794 | 48988 | 195  | discriminator of mRNA<br>degradation | 7.22  | 65  | 67.2 | 73.3 | 96.9 |                                                          |
| ORF101 | Hp45   | 48989 | 49129 | 141  | hypothetical protein                 | 5.19  | 47  |      |      |      | <i>Nectria haematococca</i><br><i>mpVI 77-13-4 (47%)</i> |
| ORF102 | gp61.4 | 49130 | 49369 | 240  | hypothetical protein                 | 9.64  | 80  | 60.3 | 97.5 | 97.5 |                                                          |
| ORF103 | sp     | 49399 | 49722 | 324  | spackle periplasmic<br>protein       | 11.91 | 108 | 74.2 | 100  | 96.2 | 100                                                      |
| ORF104 | Hp46   | 49715 | 50155 | 441  | hypothetical protein                 | 17.30 | 147 |      | 94.4 | 96.6 | 97.3                                                     |
| ORF105 | Hp47   | 50157 | 50348 | 192  | hypothetical protein                 | 7.05  | 64  |      | 100  | 98.4 |                                                          |
| ORF106 | Hp48   | 50365 | 50526 | 162  | hypothetical protein                 | 5.60  | 54  | 88.1 | 97.6 | 95.2 |                                                          |
| ORF107 | gp61   | 50565 | 51593 | 1029 | DNA primase subunit                  | 40.01 | 343 | 77   | 95.9 | 95.6 |                                                          |
| ORF108 | MobB   | 51590 | 52345 | 756  | homing endonuclease                  | 29.62 | 252 | 61.6 |      |      |                                                          |
| ORF109 | Hp49   | 52352 | 52552 | 201  | hypothetical protein                 | 7.40  | 67  |      |      |      | Enterobacteria phage                                     |



vB\_EcoM-VR7 (56.8%)

|        |        |       |       |      |                                  |       |     |      |      |      |      |
|--------|--------|-------|-------|------|----------------------------------|-------|-----|------|------|------|------|
| ORF110 | gp56   | 52652 | 53167 | 516  | dCTPase                          | 19.74 | 172 | 86.5 | 83.8 | 85.5 |      |
| ORF111 | Soc    | 53211 | 53444 | 234  | small outer capsid protein       | 8.47  | 78  | 75   | 94.8 | 96.1 | 57.4 |
| ORF112 | Mrh.2  | 53539 | 53736 | 198  | hypothetical protein             | 7.48  | 66  | 69.1 | 68.1 | 68.1 |      |
| ORF113 | Mrh.1  | 53733 | 54062 | 330  | hypothetical protein             | 11.74 | 110 | 47.3 | 79.3 | 96.5 | 87.8 |
| ORF114 | Srh    | 54062 | 54262 | 201  | transcription modulator          | 8.08  | 67  | 76.1 | 100  | 98.5 |      |
| ORF115 | ModA.4 | 54259 | 54426 | 168  | hypothetical protein             | 6.22  | 56  | 92.9 | 97.2 | 97.2 |      |
| ORF116 | ModA.3 | 54413 | 54901 | 489  | hypothetical protein             | 18.72 | 163 | 56.6 | 91.4 | 93.3 | 90.2 |
| ORF117 | ModA.2 | 54901 | 55089 | 189  | hypothetical protein             | 7.21  | 63  | 61.7 | 96.8 | 88.9 | 98.4 |
| ORF118 | ModB   | 55145 | 55714 | 570  | ADP-ribosylase                   | 22.16 | 190 | 58.8 | 94.7 | 98.4 | 95.8 |
| ORF119 | ModA   | 55898 | 56383 | 486  | ADP-ribosylase                   | 24.05 | 205 | 53.4 | 97.1 | 96.6 |      |
| ORF120 | Srd    | 56522 | 57187 | 666  | putative Srd anti-sigma factor   | 25.22 | 222 | 60.7 | 94.3 | 95.1 | 94.8 |
| ORF121 | Dda.1  | 57272 | 57571 | 300  | hypothetical protein             | 11.80 | 100 | 52.5 | 98   | 85.9 |      |
| ORF122 | Dda    | 57568 | 58899 | 1332 | DNA helicase                     | 50.57 | 444 | 74.5 | 99.1 | 98.9 |      |
| ORF123 | Hp50   | 58907 | 59146 | 240  | hypothetical protein             | 9.54  | 80  | 65.4 | 96.2 | 96.2 |      |
| ORF124 | DexA   | 59143 | 59817 | 675  | exonuclease A                    | 25.74 | 225 | 78.4 | 99.6 | 99.6 | 99.6 |
| ORF125 | MotB.2 | 59878 | 60351 | 474  | hypothetical protein             | 18.90 | 158 | 83   | 86.8 | 95.6 | 91.9 |
| ORF126 | MotB.1 | 60458 | 60928 | 471  | hypothetical protein             | 17.84 | 157 | 73.1 | 94.2 | 93.5 | 94.2 |
| ORF127 | MotB   | 61002 | 61568 | 567  | modifier of transcription        | 21.03 | 189 | 78.3 | 89.1 | 96.3 | 73   |
| ORF128 | cef    | 61641 | 61865 | 225  | cef modifier of suppressor tRNAs | 8.59  | 75  | 80.9 | 100  | 100  | 100  |

|        |         |       |       |      |                                                    |       |     |      |      |      |                                          |
|--------|---------|-------|-------|------|----------------------------------------------------|-------|-----|------|------|------|------------------------------------------|
| ORF129 | gp39.2  | 61852 | 62028 | 177  | hypothetical protein                               | 6.73  | 59  | 93.2 | 100  |      |                                          |
| ORF130 | gp39.1  | 62035 | 62295 | 261  | hypothetical protein                               | 9.35  | 87  | 88.5 | 100  | 100  | 98.8                                     |
| ORF131 | Hp51    | 62362 | 63042 | 681  | hypothetical protein                               | 26.72 | 227 | 48.7 |      | 44.3 | 45.2                                     |
| ORF132 | gp39    | 63035 | 64855 | 1821 | topoisomerase II, large subunit, N-terminal region | 68.47 | 607 | 86.3 | 88.9 | 89.1 | 88.8                                     |
| ORF133 | Hp52    | 64861 | 65061 | 201  | hypothetical protein                               | 7.91  | 67  |      |      |      | Enterobacteria phage Vb_EcoM-VR7 (82%)   |
| ORF134 | rIIA.1  | 65135 | 65458 | 324  | hypothetical protein                               | 12.12 | 108 |      |      |      | Enterobacteria phage Vb_EcoM-VR7 (63.4%) |
| ORF135 | rIIA.1' | 65445 | 65648 | 204  | hypothetical protein                               | 8.16  | 68  | 88.1 | 100  | 100  |                                          |
| ORF136 | rIIA    | 65656 | 67866 | 2211 | rIIA protector from prophage-induced early lysis   | 84.15 | 737 | 70.6 | 98.9 | 97.8 | 99                                       |
| ORF137 | rIIB    | 67881 | 68849 | 969  | rIIB protector from prophage-induced early lysis   | 36.37 | 323 | 79.1 | 95.7 | 91   | 96                                       |
| ORF138 | DenB.1  | 68887 | 69084 | 198  | hypothetical protein                               | 7.35  | 66  | 70.3 | 98.5 | 100  | 95.4                                     |
| ORF139 | Hp53    | 69077 | 69385 | 309  | hypothetical protein                               | 11.09 | 100 |      | 53.3 |      |                                          |
| ORF140 | DenB    | 69399 | 69875 | 477  | DNA endonuclease IV                                | 17.88 | 159 | 83.5 | 99.4 | 100  |                                          |
| ORF141 | Hp54    | 69904 | 70215 | 312  | hypothetical protein                               | 11.54 | 104 |      | 90.7 | 99   | 89.5                                     |
| ORF142 | Hp55    | 70591 | 71049 | 459  | hypothetical protein                               | 17.73 | 153 |      |      | 100  |                                          |
| ORF143 | Ndd     | 71139 | 71576 | 438  | nucleoid disruption protein                        | 16.53 | 150 | 76.5 | 98.7 | 100  | 98.7                                     |
| ORF144 | gp52.1  | 71664 | 71825 | 162  | hypothetical protein                               | 5.91  | 54  |      | 96%  |      | 96%                                      |
| ORF145 | gp52.1' | 71818 | 71958 | 141  | hypothetical protein                               | 5.09  | 47  | 100  | 100  | 100  | 100                                      |

|        |        |       |       |      |                                             |        |      |      |      |      |      |
|--------|--------|-------|-------|------|---------------------------------------------|--------|------|------|------|------|------|
| ORF146 | gp52   | 71963 | 73291 | 1329 | topoisomerase II<br>medium subunit          | 50.15  | 443  | 89.4 | 99.3 | 98.9 | 99.1 |
| ORF147 | Hp56   | 73500 | 73715 | 216  | hypothetical protein                        | 8.05   | 72   |      | 98.6 | 100  |      |
| ORF148 | MotA   | 73821 | 74030 | 210  | activator of middle<br>period transcription | 7.56   | 70   | 79.4 | 100  | 100  | 100  |
| ORF149 | MotA'  | 74030 | 74455 | 426  | activator of middle<br>period transcription | 16.02  | 142  | 60.9 | 99.3 | 100  | 99.3 |
| ORF150 | Arn.4  | 74470 | 74799 | 330  | hypothetical protein                        | 12.61  | 110  | 88.2 | 100  | 100  |      |
| ORF151 | Arn.3  | 74787 | 75134 | 348  | hypothetical protein                        | 13.47  | 116  |      |      | 99.1 | 75.4 |
| ORF152 | Arn.3' | 75131 | 75619 | 489  | hypothetical protein                        | 18.76  | 163  | 86   | 98.8 | 98.1 | 98.8 |
| ORF153 | Arn.2  | 75619 | 75900 | 282  | hypothetical protein                        | 10.90  | 94   | 56.1 | 90.2 | 98.9 | 100  |
| ORF154 | Hp57   | 75990 | 76148 | 159  | hypothetical protein                        | 6.35   | 53   |      | 90.6 | 100  | 100  |
| ORF155 | AsiA   | 76204 | 76479 | 276  | anti-sigma 70 protein                       | 10.79  | 92   | 76.5 | 86.8 | 100  | 100  |
| ORF156 | t      | 76476 | 77129 | 654  | holin lysis mediator                        | 24.89  | 218  | 76.4 | 92.2 | 99.5 | 99.5 |
| ORF157 | gp38   | 77158 | 77949 | 792  | long tail fiber assembly<br>catalyst        | 27.74  | 264  |      | 92.3 | 67.1 | 90.3 |
| ORF158 | gp37   | 77979 | 81239 | 3261 | long tail fiber distal<br>subunit           | 116.41 | 1087 | 46.8 | 87   | 47.7 | 72.6 |
| ORF159 | gp36   | 81248 | 81895 | 648  | long tail fiber, distal<br>connector        | 23.49  | 216  | 57.9 | 98.6 | 81.7 | 98.6 |
| ORF160 | gp35   | 81970 | 83091 | 1122 | long tail fiber, proximal<br>connector      | 41.51  | 374  | 64.7 | 94.4 | 81.3 | 94.1 |
| ORF161 | gp34   | 83103 | 87152 | 4050 | long tail fiber proximal<br>subunit         | 147.07 | 1350 | 74.8 | 98.1 | 88.9 | 96   |
| ORF162 | RNaseH | 87260 | 88207 | 948  | RNaseH ribonuclease                         | 36.46  | 316  | 75.7 | 99.4 | 100  | 100  |
| ORF163 | DsbA   | 88218 | 88487 | 270  | dsDNA binding protein                       | 10.38  | 90   | 77   | 100  | 100  | 100  |

|        |        |       |       |      |                                                    |       |     |      |      |      |      |
|--------|--------|-------|-------|------|----------------------------------------------------|-------|-----|------|------|------|------|
| ORF164 | gp33   | 88468 | 88770 | 303  | ate promoter<br>transcription accessory<br>protein | 11.05 | 101 | 77.1 | 100  |      |      |
| ORF165 | gp59   | 88767 | 89420 | 654  | DNA helicase                                       | 26.03 | 218 | 88   | 99.5 | 99.5 |      |
| ORF166 | Hp58   | 89435 | 90052 | 618  | hypothetical protein                               | 23.73 | 206 | 71.6 |      |      |      |
| ORF167 | gp32   | 90151 | 91062 | 912  | single-stranded DNA<br>binding protein             | 33.35 | 304 | 81.2 | 99.3 | 99.3 |      |
| ORF168 | Frd.2  | 91174 | 91536 | 363  | hypothetical protein                               | 13.68 | 121 | 53.2 | 85.4 | 54.2 | 86.2 |
| ORF169 | Hp59   | 91538 | 91798 | 261  | hypothetical protein                               | 9.95  | 87  |      | 100  | 100  |      |
| ORF170 | Hp60   | 91844 | 92089 | 246  | hypothetical protein                               | 9.56  | 82  | 86.7 | 96   | 97.5 |      |
| ORF171 | Frd.1  | 92145 | 92384 | 240  | hypothetical protein                               | 9.11  | 80  | 86.1 | 97.5 | 97.5 | 97.5 |
| ORF172 | Frd    | 92392 | 92973 | 582  | dihydrofolate reductase                            | 21.91 | 194 | 90.7 | 91.8 | 96.9 | 96.9 |
| ORF173 | Ts     | 92970 | 93830 | 861  | dTMP thymidylate<br>synthase                       | 33.12 | 287 | 89.5 | 94.4 | 92.7 | 94   |
| ORF174 | NrdA.1 | 93892 | 94185 | 294  | hypothetical protein                               | 11.38 | 98  | 77.6 | 99   |      | 99   |
| ORF175 | NrdA   | 94252 | 96507 | 2256 | aerobic NDP reductase<br>large subunit             | 85.89 | 752 | 93.7 | 99.3 | 99.5 | 99.5 |
| ORF176 | NrdB   | 96562 | 96792 | 231  | aerobic NDP reductase,<br>small subunit            | 8.84  | 77  | 95.1 | 100  | 100  | 100  |
| ORF177 | NrdB   | 96789 | 97238 | 450  | aerobic NDP reductase,<br>small subunit            | 17.62 | 150 | 87.6 | 91.2 | 91.2 | 91.2 |
| ORF178 | NrdB   | 97382 | 98188 | 807  | I-TevIII                                           | 30.78 | 269 | 96.6 |      |      |      |
| ORF179 | NrdB   | 98348 | 98827 | 480  | aerobic NDP reductase,<br>small subunit            | 18.35 | 160 | 94.3 | 100  | 99.4 | 99.4 |
| ORF180 | DenA   | 98831 | 99268 | 438  | endonuclease II                                    | 16.72 | 146 | 83.3 | 99.3 | 100  |      |

---

|        |        |        |        |      |                                                       |       |     |      |      |      |      |
|--------|--------|--------|--------|------|-------------------------------------------------------|-------|-----|------|------|------|------|
| ORF181 | RnlA   | 99297  | 100421 | 1125 | RNA ligase 1 and tail<br>fiber attachment<br>catalyst | 43.75 | 383 | 69   | 99   | 99.5 | 98.7 |
| ORF182 | PseT.3 | 100968 | 101321 | 354  | RNA ligase 1 and tail<br>fiber attachment<br>catalyst | 13.24 | 118 | 60   | 99.1 | 100  | 99.1 |
| ORF183 | PseT.3 | 101318 | 101608 | 291  | RNA ligase 1 and tail<br>fiber attachment<br>catalyst | 11.18 | 97  | 78.8 | 97.9 | 100  | 97.9 |
| ORF184 | Hp61   | 101740 | 102075 | 336  | hypothetical protein                                  | 12.34 | 112 |      | 72.4 | 91.3 | 72.4 |
| ORF185 | PseT   | 102076 | 102984 | 909  | polynucleotide<br>5'-kinase and<br>3'-phosphatase     | 35.07 | 303 | 93   | 98   | 98   | 97.3 |
| ORF186 | Cd.4   | 102984 | 103181 | 198  | hypothetical protein                                  | 7.66  | 66  | 80   | 100  | 100  | 98.5 |
| ORF187 | Cd.4   | 103174 | 103389 | 216  | hypothetical protein                                  | 8.40  | 72  |      | 98.6 | 100  |      |
| ORF188 | Cd.3   | 103397 | 103675 | 279  | hypothetical protein                                  | 10.22 | 93  | 69.2 | 97.8 | 97.8 | 97.8 |
| ORF189 | Hp62   | 103687 | 104292 | 606  | hypothetical protein                                  | 23.06 | 202 |      | 91.3 | 90.3 | 91.3 |
| ORF190 | Cd.2   | 104292 | 104525 | 234  | hypothetical protein                                  | 8.57  | 78  | 82.6 | 97.4 | 98.7 | 100  |
| ORF191 | Cd     | 104522 | 105067 | 546  | dCMP deaminase                                        | 20.15 | 182 | 76.7 | 99.4 | 100  |      |
| ORF192 | gp31.1 | 105302 | 105601 | 300  | hypothetical protein                                  | 11.49 | 100 | 60.8 | 98   | 79.6 | 93.1 |
| ORF193 | gp31   | 105660 | 105983 | 324  | head assembly<br>cochaperone with<br>GroEL            | 11.62 | 108 | 90.6 | 99.1 | 99.1 |      |

---

---

|        |        |        |        |      |                                                               |       |     |      |      |      |      |
|--------|--------|--------|--------|------|---------------------------------------------------------------|-------|-----|------|------|------|------|
| ORF194 | rIII   | 106130 | 106378 | 249  | lysis inhibition<br>accessory protein<br>rapidlysis phenotype | 9.29  | 83  | 93.9 | 98.8 | 100  | 97.6 |
| ORF195 | gp30.9 | 106642 | 106803 | 162  | hypothetical protein                                          | 5.80  | 54  | 79.1 | 100  |      | 100  |
| ORF196 | gp30.8 | 106925 | 107257 | 333  | hypothetical protein                                          | 12.79 | 111 | 90   | 99.1 | 56.9 |      |
| ORF197 | gp30.7 | 107466 | 107696 | 231  | hypothetical protein                                          | 14.09 | 122 | 95.9 | 98.3 | 98.3 |      |
| ORF198 | gp30.6 | 107705 | 108025 | 321  | hypothetical protein                                          | 11.97 | 107 | 89.5 | 98.9 | 98.1 | 98.9 |
| ORF199 | gp30.5 | 108025 | 108219 | 195  | hypothetical protein                                          | 6.97  | 65  | 76.2 | 96.9 | 100  |      |
| ORF200 | gp30.4 | 108221 | 108436 | 216  | hypothetical protein                                          | 8.05  | 72  | 73.1 | 98.6 | 88.6 |      |
| ORF201 | gp30.3 | 108429 | 108887 | 459  | hypothetical protein                                          | 17.38 | 153 | 93.4 | 94.1 | 96.7 |      |
| ORF202 | gp30.2 | 108884 | 109522 | 639  | hypothetical protein                                          | 24.39 | 213 | 85.9 | 100  | 100  |      |
| ORF203 | gp30.1 | 109524 | 109802 | 279  | hypothetical protein                                          | 11.04 | 93  | 65.1 | 70.5 |      |      |
| ORF204 | gp30   | 109795 | 111336 | 1542 | DNA ligase                                                    | 57.92 | 514 | 74.5 | 99.2 | 96.8 | 99   |
| ORF205 | Alt.1  | 111338 | 111520 | 183  | hypothetical protein                                          | 6.89  | 61  | 82   | 83.9 | 73.7 | 85.7 |
| ORF206 | Alt    | 111575 | 113659 | 2085 | ADP-ribosylase                                                | 77.44 | 695 | 66.4 | 81.2 | 98.8 | 98.4 |
| ORF207 | Alt'   | 113660 | 115714 | 2055 | ADP-ribosylase                                                | 75.97 | 685 | 77.4 | 68.8 | 71.8 | 71.2 |
| ORF208 | Alt.-3 | 115772 | 116062 | 291  | hypothetical protein                                          | 10.79 | 97  | 74   | 99   | 99   | 97.9 |
| ORF209 | gp54   | 116109 | 117050 | 942  | baseplate tail tube<br>initiator                              | 34.06 | 314 | 81.2 | 99.7 | 99   |      |
| ORF210 | gp48   | 117050 | 118138 | 1089 | baseplate tail tube cap                                       | 39.67 | 363 | 73.7 | 96.4 | 97.2 |      |
| ORF211 | gp29   | 118147 | 119883 | 1737 | baseplate hub subunit                                         | 64.13 | 579 | 55.6 | 98.8 | 99.5 | 98.8 |
| ORF212 | gp28   | 119867 | 120394 | 528  | baseplate hub subunit                                         | 19.88 | 176 | 73.1 | 98.8 | 99.4 |      |
| ORF213 | gp27   | 120348 | 121517 | 1170 | baseplate hub subunit                                         | 44.94 | 390 | 78.7 | 100  | 100  |      |
| ORF214 | gp51   | 121514 | 122266 | 753  | baseplate hub assembly<br>catalyst                            | 29.47 | 251 | 76.5 | 100  | 98.8 | 98.8 |

---

---

|        |         |        |        |      |                                                      |       |     |      |      |      |      |
|--------|---------|--------|--------|------|------------------------------------------------------|-------|-----|------|------|------|------|
| ORF215 | gp26    | 122317 | 122940 | 624  | baseplate hub subunit                                | 23.68 | 208 | 68.3 | 97.1 | 98.6 | 97.1 |
| ORF216 | gp25    | 122940 | 123329 | 390  | baseplate hub subunit                                | 14.43 | 130 | 86   | 99.2 | 98.4 | 99.2 |
| ORF217 | UvsY    | 123355 | 123822 | 468  | recombination repair<br>and ssDNA binding<br>protein | 18.29 | 156 | 81.6 | 100  | 98.7 |      |
| ORF218 | UvsY.-2 | 123949 | 124116 | 168  | hypothetical protein                                 | 6.04  | 56  | 95   | 100  | 97.5 |      |
| ORF219 | Hp63    | 124176 | 124403 | 228  | hypothetical protein                                 | 8.63  | 76  | 84.7 | 96.8 | 98.4 |      |
| ORF220 | MobE    | 124400 | 125182 | 783  | homing endonuclease                                  | 29.52 | 261 | 61.8 |      |      |      |
| ORF221 | UvsW    | 125179 | 126159 | 981  | DNA helicase                                         | 37.38 | 327 | 87   | 97.2 | 97.2 | 97.5 |
| ORF222 | UvsW'   | 126470 | 126682 | 213  | DNA helicase ATPase                                  | 8.41  | 71  | 91.1 | 96.4 | 96.4 | 96.4 |
| ORF223 | Inh     | 126738 | 127409 | 672  | inhibitor of prohead<br>protease gp21                | 25.38 | 224 | 78.7 | 97.3 | 92.8 | 96.4 |
| ORF224 | Hoc     | 127419 | 128267 | 849  | head outer capsid<br>protein                         | 29.91 | 283 | 66.5 | 97.2 | 94.2 | 76.9 |
| ORF225 | gp24.3  | 128332 | 128493 | 162  | hypothetical protein                                 | 6.20  | 54  | 69.7 | 100  | 95.1 | 100  |
| ORF226 | RnlB    | 128696 | 129703 | 1008 | RNA ligase 2                                         | 37.97 | 336 | 81.7 | 98.5 | 98.8 | 99.1 |
| ORF227 | gp24    | 129730 | 131010 | 1281 | head vertex protein                                  | 46.57 | 427 | 76.1 | 96.2 | 96   | 99.3 |
| ORF228 | gp24'   | 131010 | 132293 | 1284 | head vertex protein                                  | 46.72 | 428 | 84   | 98.1 | 98.4 | 99.1 |
| ORF229 | Hp64    | 132380 | 132661 | 282  | hypothetical protein                                 | 10.98 | 94  |      | 100  | 100  | 96.6 |
| ORF230 | gp23    | 132711 | 134270 | 1560 | major head protein                                   | 55.73 | 520 | 90.5 | 99.8 | 99.8 | 99.4 |
| ORF231 | gp22    | 134292 | 135107 | 816  | prohead core scaffold<br>protein                     | 29.91 | 272 | 88.1 | 98.2 | 97.4 |      |
| ORF232 | gp21    | 135138 | 135773 | 636  | prohead core scaffold<br>protein and protease        | 23.05 | 212 | 94.9 | 100  | 100  |      |

---

|        |       |        |        |      |                                               |       |     |      |      |      |                                          |
|--------|-------|--------|--------|------|-----------------------------------------------|-------|-----|------|------|------|------------------------------------------|
| ORF233 | gp68  | 135773 | 136201 | 429  | prohead core protein                          | 15.95 | 143 | 85.1 | 97.9 | 97.2 |                                          |
| ORF234 | gp67  | 136201 | 136446 | 246  | prohead core protein precursor                | 8.97  | 82  | 68.1 | 95.6 | 97.9 | 95.6                                     |
| ORF235 | gp20  | 136446 | 137690 | 1245 | portal vertex protein of head                 | 48.58 | 415 | 90.8 | 100  | 100  | 100                                      |
| ORF236 | gp20' | 137696 | 138019 | 324  | portal vertex protein of head                 | 12.51 | 108 | 74.7 | 100  | 100  | 100                                      |
| ORF237 | Hp65  | 138077 | 138658 | 582  | hypothetical protein                          | 22.39 | 194 |      |      |      | Enterobacteria phage Vb_EcoM-VR7 (39.6%) |
| ORF238 | gp19  | 138726 | 139217 | 492  | tail tube protein                             | 18.76 | 164 | 86.5 | 100  | 100  |                                          |
| ORF239 | Hp66  | 139255 | 139926 | 672  | hypothetical protein                          | 25.90 | 224 |      |      |      | Acinetobacter phage Aci61 (57.1% )       |
| ORF240 | gp18  | 140108 | 142090 | 1983 | tail sheath protein                           | 71.77 | 661 | 84.9 | 98.9 | 98.9 |                                          |
| ORF241 | gp17  | 142123 | 143958 | 1836 | terminase DNA packaging enzyme large subunit  | 70.57 | 612 | 91   | 99.5 | 99.5 | 99.5                                     |
| ORF242 | gp16  | 143942 | 144433 | 492  | terminase DNA packaging enzyme small subunit  | 18.25 | 164 | 90.2 | 98.2 | 98.2 |                                          |
| ORF243 | gp15  | 144430 | 145248 | 819  | tail sheath stabilizer and completion protein | 31.78 | 273 | 78.2 | 99.2 | 98.8 | 98.8                                     |
| ORF244 | gp14  | 145338 | 146111 | 774  | neck protein                                  | 29.49 | 258 | 84   | 99.6 | 99.6 | 99.6                                     |
| ORF245 | gp13  | 146114 | 147049 | 936  | neck protein                                  | 34.76 | 312 | 81.5 | 100  | 97.7 |                                          |
| ORF246 | Wac   | 147104 | 148693 | 1590 | fibritin neck whiskers                        | 57.78 | 530 | 58.5 | 93.7 | 82.3 | 94.3                                     |
| ORF247 | gp12  | 148703 | 150229 | 1527 | short tail fibers                             | 53.22 | 509 | 62.4 | 99.6 | 81.1 | 99.8                                     |



|        |      |        |        |      |                                               |        |      |      |      |      |                             |
|--------|------|--------|--------|------|-----------------------------------------------|--------|------|------|------|------|-----------------------------|
| ORF248 | gp11 | 150229 | 150894 | 666  | baseplate wedge subunit and tail pin          | 24.08  | 222  | 51.6 | 100  | 93.6 | 100                         |
| ORF249 | gp10 | 150894 | 152705 | 1812 | baseplate wedge subunit and tail pin          | 65.79  | 604  | 68.3 | 99.3 | 89.9 | 99.5                        |
| ORF250 | gp9  | 152705 | 153565 | 861  | baseplate wedge tail fiber                    | 31.31  | 287  | 65.4 | 99.7 | 95.1 |                             |
| ORF251 | gp8  | 153627 | 154631 | 1005 | baseplate wedge subunit                       | 38.41  | 335  | 86.2 | 99.7 | 99.1 |                             |
| ORF252 | gp7  | 154624 | 157719 | 3096 | baseplate wedge initiator                     | 120.19 | 1032 | 77.6 | 99.3 | 97   |                             |
| ORF253 | gp6  | 157747 | 159705 | 1959 | baseplate wedge subunit                       | 73.60  | 653  | 82.5 | 99.7 | 98   |                             |
| ORF254 | Hp67 | 159707 | 161770 | 2064 | hypothetical protein                          | 77.08  | 688  |      |      |      | Shigella phage_SP18 (99.9%) |
| ORF255 | gp5  | 161772 | 163559 | 1788 | baseplate hub subunit and tail lysozyme       | 65.57  | 596  | 77   | 88.4 | 88.9 | 88.7                        |
| ORF256 | gp53 | 163559 | 164161 | 603  | baseplate wedge subunit                       | 23.48  | 201  | 81.2 | 99   | 99.5 |                             |
| ORF257 | gp4  | 164208 | 164657 | 450  | head completion protein                       | 18.03  | 150  | 78.5 | 94.6 | 99.3 |                             |
| ORF258 | gp2  | 164654 | 165481 | 828  | DNA end protector protein                     | 31.29  | 276  | 87.2 | 99.3 | 98.9 |                             |
| ORF259 | gp3  | 165564 | 166154 | 591  | tail completion and sheath stabilizer protein | 22.19  | 197  | 71.6 | 100  | 99.5 | 100                         |
| ORF260 | gp1  | 166154 | 166915 | 762  | dNMP kinase                                   | 28.90  | 254  | 67.6 | 98.8 | 99.2 | 98.4                        |

---

|        |       |        |        |     |                          |       |     |      |      |      |      |
|--------|-------|--------|--------|-----|--------------------------|-------|-----|------|------|------|------|
| ORF261 | gp57A | 166908 | 167153 | 246 | chaperone for tail fiber | 8.85  | 82  | 75.7 | 100  | 78.6 | 100  |
| ORF262 | gp57B | 167153 | 167560 | 408 | hypothetical protein     | 15.21 | 136 | 89.6 | 99.3 | 99.3 | 99.3 |
| ORF263 | IpI   | 167636 | 167914 | 279 | internal head protein    | 9.90  | 93  | 77.7 |      |      |      |

---
